# Supplementary material for: Association between Clinical and Histopathological Findings in Intestinal Neuronal Dysplasia Type B: An Advance towards Its Definition as a Disease
Source: MDPI journal article supplement (doi:10.3390/life13051175), 2023-05-12
Supplement: s1 [file s1]

**Table S1: exploratory factor analysis applying the principal components method.**

| <b>Variables</b>                                                              | <b>Factor 1</b><br>(28% of the<br>variation<br>explained) | <b>Factor 2</b><br>(17% of the<br>variation<br>explained) | <b>Commonalities</b> |
|-------------------------------------------------------------------------------|-----------------------------------------------------------|-----------------------------------------------------------|----------------------|
| Sex                                                                           | -0.36976                                                  | -0.11383                                                  | 0.14968337           |
| Born to term                                                                  | 0.14257                                                   | 0.59061                                                   | 0.36914302           |
| Birth weight                                                                  | 0.32672                                                   | -0.39439                                                  | 0.26228682           |
| Problems in the neonatal period                                               | 0.63274                                                   | 0.30084                                                   | 0.49086572           |
| Other malformations                                                           | 0.24566                                                   | 0.16446                                                   | 0.08739573           |
| Delayed meconium passage                                                      | 0.25442                                                   | 0.06318                                                   | 0.06872026           |
| Age of onset of symptoms                                                      | -0.29863                                                  | 0.14387                                                   | 0.10988133           |
| Maximum number of days without bowel movement                                 | 0.04793                                                   | -0.75333                                                  | 0.56980449           |
| Number of bowel movements per week                                            | 0.00138                                                   | 0.04238                                                   | 0.00179796           |
| Age at diagnosis                                                              | -0.70306                                                  | 0.43236                                                   | 0.68122894           |
| Need for bowel washouts                                                       | 0.55462                                                   | -0.2281                                                   | 0.35964037           |
| Rome IV Q1: < 2 bowel movements per week                                      | 0.59909                                                   | -0.3154                                                   | 0.45838443           |
| Rome IV Q2: > 1 episode of fecal incontinence per week                        | -0.24887                                                  | 0.6455                                                    | 0.47860546           |
| Rome IV Q3: history of episodes of fecal retention                            | 0.27569                                                   | 0.92252                                                   | 0.92704185           |
| Rome IV Q4: painful or hard bowel movements                                   | 0.27569                                                   | 0.92252                                                   | 0.92704185           |
| Rome IV Q5: large fecal mass present in the rectum                            | 0.93576                                                   | 0.24813                                                   | 0.93721924           |
| Rome IV Q6: large diameter stools that can obstruct the toilet                | 0.41256                                                   | 0.17498                                                   | 0.20082856           |
| Abdominal distension                                                          | 0.27569                                                   | 0.92252                                                   | 0.92704185           |
| Abdominal pain                                                                | 0.27569                                                   | 0.92252                                                   | 0.92704185           |
| Rectal bleeding                                                               | 0.58657                                                   | 0.33643                                                   | 0.45725263           |
| Intestinal Symptom Index (ISI)                                                | 0.59803                                                   | 0.68232                                                   | 0.82320183           |
| Number of plexuses with more than 7 neurons                                   | -0.55234                                                  | 0.13644                                                   | 0.32369045           |
| Number of giant ganglia                                                       | 0.81355                                                   | 0.1761                                                    | 0.69287359           |
| Number of neurons in 25 ganglia                                               | 0.78385                                                   | 0.46596                                                   | 0.831539             |
| Maximum number of neurons per ganglia                                         | 0.65466                                                   | 0.26321                                                   | 0.49785417           |
| Maximum width of a plexus                                                     | -0.13106                                                  | -0.14222                                                  | 0.03740139           |
| Area of a neuron                                                              | -0.70673                                                  | 0.33984                                                   | 0.6149547            |
| Mean of neurons per ganglia                                                   | 0.78385                                                   | 0.46596                                                   | 0.831539             |
| Bud-like nerve cell groups along nerve trunks                                 | 0.45286                                                   | -0.00031                                                  | 0.20508568           |
| Ganglia with signs of immaturity                                              | 0.38736                                                   | 0.38166                                                   | 0.29571201           |
| Small neurons                                                                 | 0.11609                                                   | -0.29623                                                  | 0.10122901           |
| Anisomorphic neurons                                                          | -0.5993                                                   | 0.07521                                                   | 0.36481879           |
| Calretinin IHC expression in nerve fibers in the lamina propria of the mucosa | -0.34273                                                  | -0.03628                                                  | 0.11877902           |
| Calretinin IHC expression in heterotopic neurons in the muscularis mucosa     | -0.03404                                                  | -0.65429                                                  | 0.42926056           |
| Calretinin IHC expression in heterotopic neurons in the lamina propria        | -0.4923                                                   | 0.48742                                                   | 0.47993282           |
